# Supplementary material
Source: ML conference proceedings conference paper supplement (https://openreview.net/forum?id=SzrQBJDYHn)

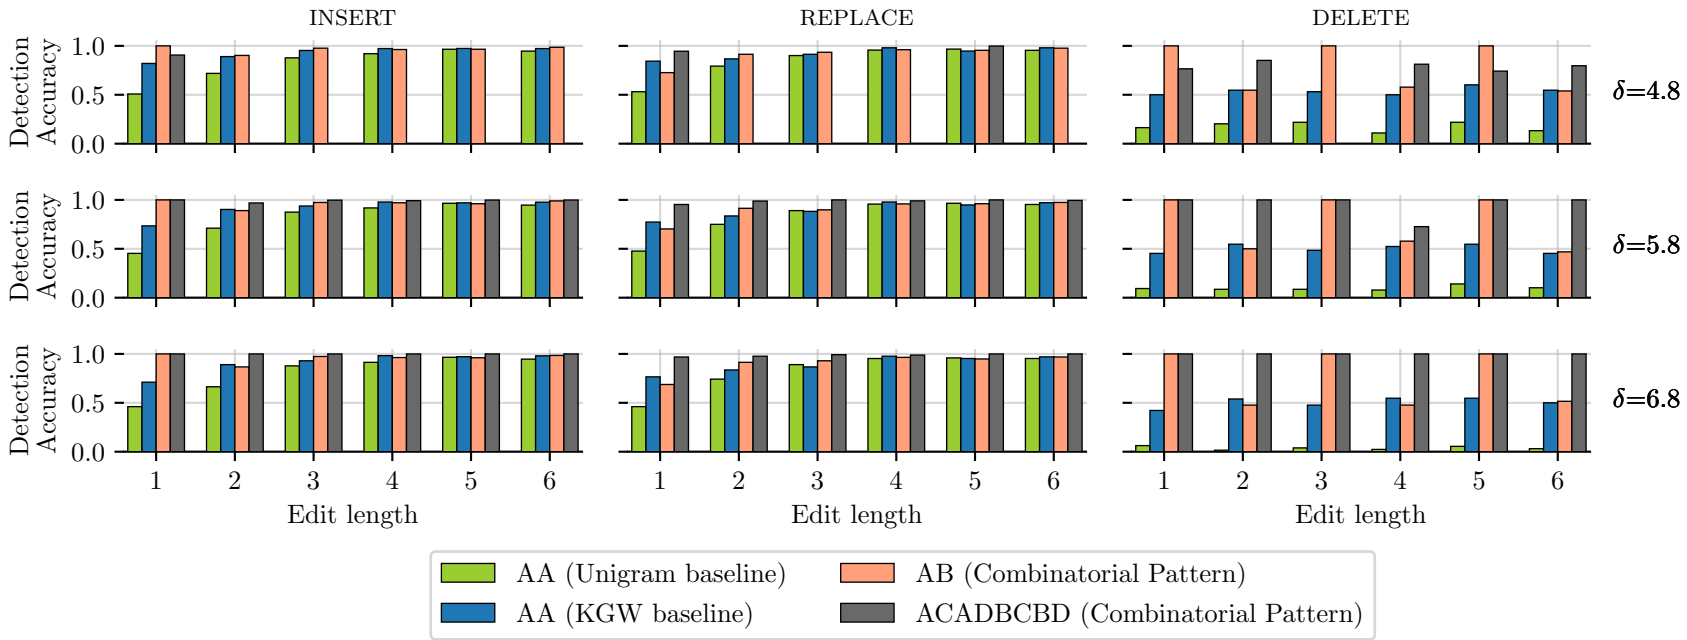

Supplement: supplementary_material [file 15_llama_delta_comparison.pdf › demo code/15_llama_delta_comparison.pdf]

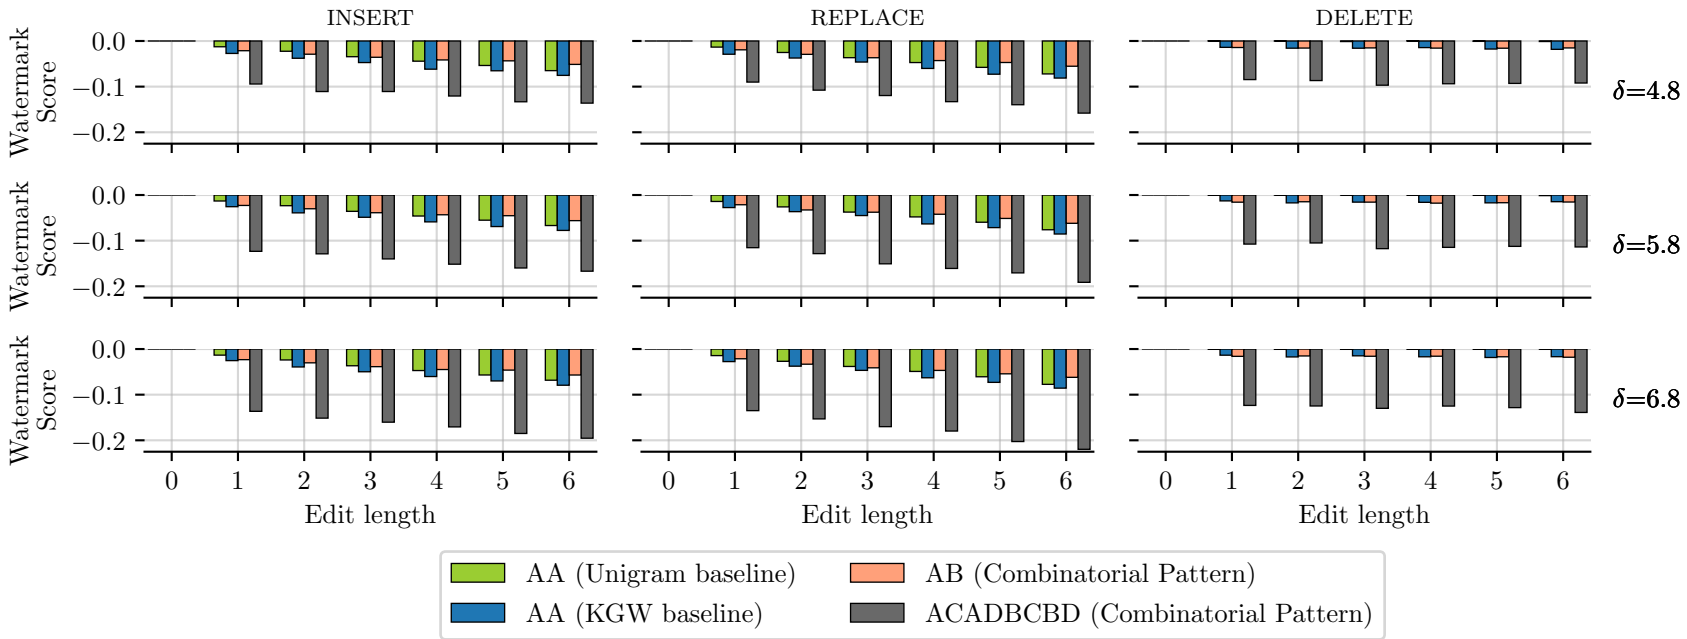

Supplement: supplementary_material [file 15_llama_delta_comparison_wm.pdf › demo code/15_llama_delta_comparison_wm.pdf]

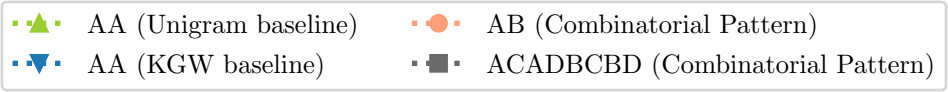

Supplement: supplementary_material [file 16_PPL.legend.pdf › demo code/16_PPL.legend.pdf]

OPT-1.3b

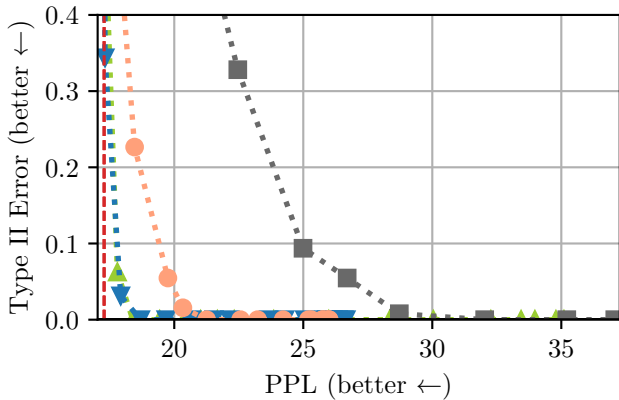

Llama-2-7b

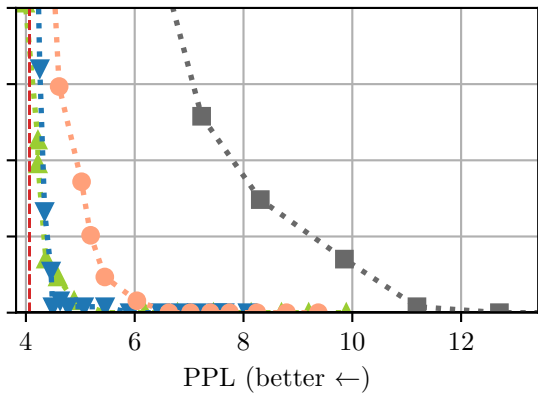

Supplement: supplementary_material [file 16_PPL.pdf › demo code/16_PPL.pdf]
